# Supplementary material for: Comparing Benzodithiophene Unit with Alkylthionaphthyl and Alkylthiobiphenyl Side-Chains in Constructing High-Performance Nonfullerene Solar Cells
Source: MDPI journal article supplement (doi:10.3390/polym12081673), 2020-07-27
Supplement: s1 [file s1]

Comparing Benzodithiophene Unit with Alkylthionaphthyl and Alkylthiobiphenyl Side Chains in Constructing High Performance Non-Fullerene Solar Cells

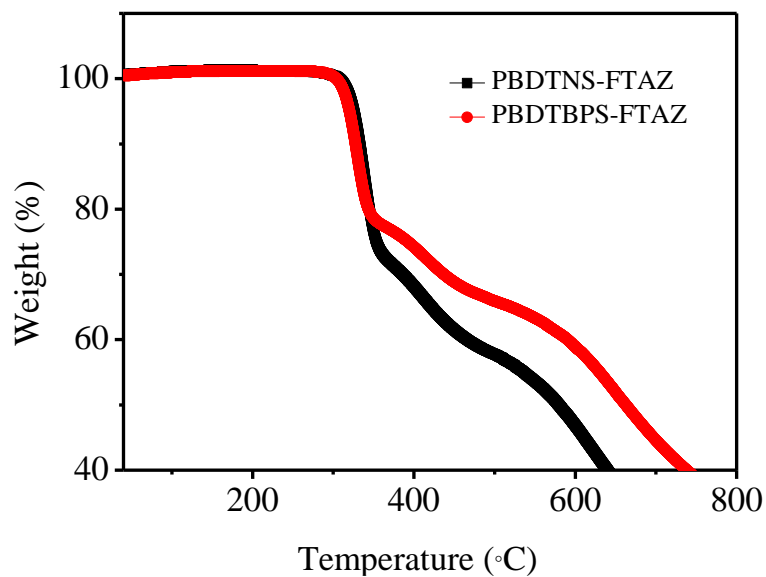

Figure S1. TGA plots of PBDTNS-FTAZ and PBDTBPS-FTAZ.

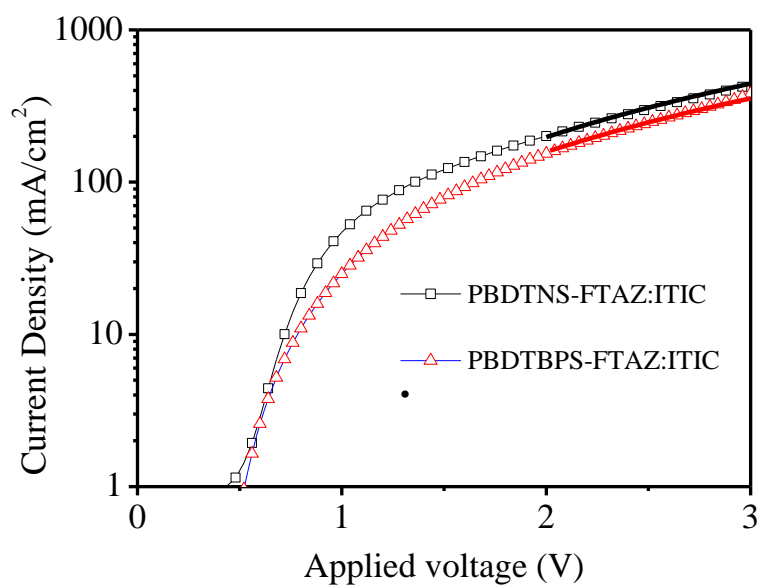

Figure S2. *J-V* curves of vertical diodes with the device structures of ITO/PEDOT:PSS/polymer:ITIC/Au for hole only devices.
